# Supplementary material for: Preoperative risk grade predicts the long-term prognosis of intrahepatic cholangiocarcinoma: a retrospective cohort analysis
Source: Research Square preprint supplement (doi:10.21203/rs.3.rs-31366/v4), 2020-11-16
Supplement: Supplementary file 1 [file f689716e4ac3a481c83dac1a.docx]

Supplementary Table 1. The definition of the Preoperative Risk Grade

| Variables | Preoperative Risk Grade |
| --- | --- |
| PLR (< 143.5) and ALB (≥ 40 g/L) | 0 |
| PLR (< 143.5) and ALB (<40 g/L) | 1 |
| PLR (≥ 143.5) and ALB (≥ 40 g/L) | 1 |
| PLR (≥ 143.5) and ALB (< 40 g/L) | 2 |

PLR, platelet to lymphocyte ratio; ALB, albumin.
